# Supplementary material for: T1SEstacker: A Tri-Layer Stacking Model Effectively Predicts Bacterial Type 1 Secreted Proteins Based on C-Terminal Non-repeats-in-Toxin-Motif Sequence Features
Source: Front Microbiol. 2022 Feb 8;12:813094. doi: 10.3389/fmicb.2021.813094 (PMC8861453; doi:10.3389/fmicb.2021.813094)
Supplement: Supplementary Dataset 2 — Repeats-in-toxin motif distribution within the experimentally verified T1SEs and the prediction results of T1SEstacker_C60 and T1SEstacker_C20. [file Table_2.XLSX]

## Sheet: T1SEstacker_C20_pred
Prot	Pattern	Voting
CAA48711.1	RTX	0.8
CAA45858.1	RTX	1
CAA35178.1	non-RTX	1
CAA39137.1	RTX	1
sp|P22522.1|CEAV_ECOLX	non-RTX	0
sp|P08715.1|HLYAP_ECOLX	RTX	1
sp|P22542.1|HSTI_ECOLX	non-RTX	0
AAA63637.1	RTX	1
AAA24860.1	RTX	1
AAA25881.1	RTX	1
AAA25882.1	RTX	1
BAA02519.1	RTX	1
AAA99902.1	RTX	1
CAA50501.1	RTX	1
CAA49611.1	RTX	1
AAA16444.1	RTX	0.4
AAA81002.1	RTX	1
sp|Q07162.1|PRTG_DICCH	RTX	1
CAB01938.1	RTX	1
AAB64093.1	RTX	0
CAA05794.1	non-RTX	0.8
AAC33448.1	RTX	1
AAC33449.1	RTX	1
AAD09851.1	RTX	1
AAD02003.1	RTX	1
AAD02005.1	RTX	1
AAD09856.1	RTX	1
AAD49575.1	RTX	1
BAA84997.1	RTX	1
AAC38665.2	RTX	1
AAF07961.1	RTX	1
AAF36415.1	RTX	1
AAF85206.1	RTX	0.2
AAF85544.1	RTX	1
AAF87588.1	RTX	1
AAG07528.1	non-RTX	0
NP_052624.1	RTX	1
sp|Q9K0K9.1|FRPA_NEIMB	RTX	1
BAB55900.1	non-RTX	0.8
AAK84651.1	RTX	1
BAB64913.1	RTX	1
AAL13281.1	RTX	1
BAB77791.1	non-RTX	1
AAL55666.1	RTX	1
sp|Q54450.1|HASA_SERMA	non-RTX	1
AAM45569.1	RTX	1
AAN66431.1	RTX	0.8
AAN78844.1	RTX	1
AAO39136.1	RTX	1
sp|P07268.2|PRZN_SERME	RTX	1
CAE11797.1	non-RTX	1
CAE31684.1	RTX	1
BAC96357.1	non-RTX	1
BAC98496.1	RTX	1
AAT48728.1	RTX	1
AAU84700.1	RTX	1
CAH11847.1	RTX	1
AAW74644.1	non-RTX	0.2
sp|Q9RCG8.1|PAXA_PASAE	RTX	1
sp|Q59933|Q59933_SERMA	RTX	1
ABA71877.1	RTX	1
sp|Q8EIX3.1|HIPA_SHEON	non-RTX	0
sp|P73817.1|SLAP_SYNY3	RTX	0.8
CAK10399.1	non-RTX	1
ABK58601.1	RTX	0
ABL74377.1	RTX	0.6
sp|Q2GHT8|Q2GHT8_EHRCR	non-RTX	0.2
sp|Q2GHU2|Q2GHU2_EHRCR	non-RTX	0.4
sp|Q2GI62|Q2GI62_EHRCR	non-RTX	1
sp|Q2GGE3|Q2GGE3_EHRCR	non-RTX	0
ABM92275.1	non-RTX	0
AAK89027.2	RTX	1
ABY65933.1	RTX	1
BAG82826.1	RTX	1
BAG82830.1	RTX	0.8
ACT56857.1	non-RTX	1
ACT56899.1	non-RTX	0
ACT79986.1	RTX	0.8
CBA23978.1	RTX	1
BAJ09609.1	RTX	1
AEI83416.1	non-RTX	0
CCJ09638.1	RTX	1
WP_001353651.1	non-RTX	0
WP_012680947.1	RTX	1
WP_015674428.1	RTX	1
OBW99045.1	RTX	0.4
SAY42838.1	RTX	1
WP_080365591.1	RTX	0
SJK83387.1	non-RTX	0
FAA01213.1	non-RTX	1
AWB74152.1	RTX	1
WP_124740661.1	RTX	0
QBC16337.1	RTX	0.2
WP_130399201.1	RTX	0.4
WP_148335754.1	RTX	1
VVM43366.1	RTX	1
WP_181643882.1	RTX	1
WP_193847526.1	non-RTX	1
sp|Q9KS12.2|MARTX_VIBCH	RTX	0.2

## Sheet: T1SEstacker_C60_pred
Prot	Pattern	voting
CAA48711.1	RTX	1
CAA45858.1	RTX	1
CAA35178.1	non-RTX	1
CAA39137.1	RTX	1
sp|P22522.1|CEAV_ECOLX	non-RTX	0
sp|P08715.1|HLYAP_ECOLX	RTX	1
sp|P22542.1|HSTI_ECOLX	non-RTX	0
AAA63637.1	RTX	1
AAA24860.1	RTX	1
AAA25881.1	RTX	1
AAA25882.1	RTX	1
BAA02519.1	RTX	0.8
AAA99902.1	RTX	1
CAA50501.1	RTX	1
CAA49611.1	RTX	1
AAA16444.1	RTX	0.2
AAA81002.1	RTX	1
sp|Q07162.1|PRTG_DICCH	RTX	1
CAB01938.1	RTX	1
AAB64093.1	RTX	1
CAA05794.1	non-RTX	1
AAC33448.1	RTX	1
AAC33449.1	RTX	1
AAD09851.1	RTX	1
AAD02003.1	RTX	1
AAD02005.1	RTX	1
AAD09856.1	RTX	1
AAD49575.1	RTX	1
BAA84997.1	RTX	1
AAC38665.2	RTX	1
AAF07961.1	RTX	1
AAF36415.1	RTX	1
AAF85206.1	RTX	1
AAF85544.1	RTX	0.8
AAF87588.1	RTX	1
AAG07528.1	non-RTX	1
NP_052624.1	RTX	1
sp|Q9K0K9.1|FRPA_NEIMB	RTX	1
BAB55900.1	non-RTX	0
AAK84651.1	RTX	0.2
BAB64913.1	RTX	1
AAL13281.1	RTX	1
BAB77791.1	non-RTX	1
AAL55666.1	RTX	1
sp|Q54450.1|HASA_SERMA	non-RTX	1
AAM45569.1	RTX	1
AAN66431.1	RTX	1
AAN78844.1	RTX	1
AAO39136.1	RTX	1
sp|P07268.2|PRZN_SERME	RTX	1
CAE11797.1	non-RTX	1
CAE31684.1	RTX	1
BAC96357.1	non-RTX	1
BAC98496.1	RTX	1
AAT48728.1	RTX	1
AAU84700.1	RTX	1
CAH11847.1	RTX	1
AAW74644.1	non-RTX	0.6
sp|Q9RCG8.1|PAXA_PASAE	RTX	0.8
sp|Q59933|Q59933_SERMA	RTX	1
ABA71877.1	RTX	1
sp|Q8EIX3.1|HIPA_SHEON	non-RTX	0
sp|P73817.1|SLAP_SYNY3	RTX	0.8
CAK10399.1	non-RTX	1
ABK58601.1	RTX	0.2
ABL74377.1	RTX	1
sp|Q2GHT8|Q2GHT8_EHRCR	non-RTX	0
sp|Q2GHU2|Q2GHU2_EHRCR	non-RTX	1
sp|Q2GI62|Q2GI62_EHRCR	non-RTX	0.2
sp|Q2GGE3|Q2GGE3_EHRCR	non-RTX	0
ABM92275.1	non-RTX	0
AAK89027.2	RTX	1
ABY65933.1	RTX	1
BAG82826.1	RTX	0
BAG82830.1	RTX	1
ACT56857.1	non-RTX	1
ACT56899.1	non-RTX	0
ACT79986.1	RTX	0
CBA23978.1	RTX	1
BAJ09609.1	RTX	1
AEI83416.1	non-RTX	0
CCJ09638.1	RTX	1
WP_001353651.1	non-RTX	0
WP_012680947.1	RTX	1
WP_015674428.1	RTX	1
OBW99045.1	RTX	1
SAY42838.1	RTX	1
WP_080365591.1	RTX	0.4
SJK83387.1	non-RTX	0
FAA01213.1	non-RTX	1
AWB74152.1	RTX	1
WP_124740661.1	RTX	0.4
QBC16337.1	RTX	0.8
WP_130399201.1	RTX	0.8
WP_148335754.1	RTX	1
VVM43366.1	RTX	1
WP_181643882.1	RTX	1
WP_193847526.1	non-RTX	1
sp|Q9KS12.2|MARTX_VIBCH	RTX	0.8
